# Supplementary material for: Serotonin Transporter Deficiency Induces Metabolic Alterations in the Ileal Mucosa
Source: MDPI journal article supplement (doi:10.3390/ijms25084459), 2024-04-18
Supplement: s1 [file s1]

A

## Phosphatidylcholine (PC)

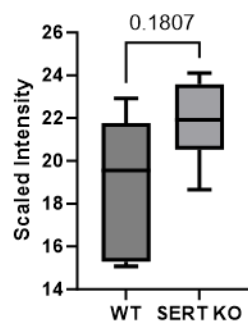

B

## Phosphatidylethanolamine (PE)

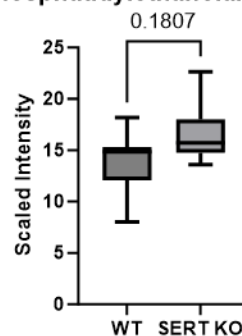

C

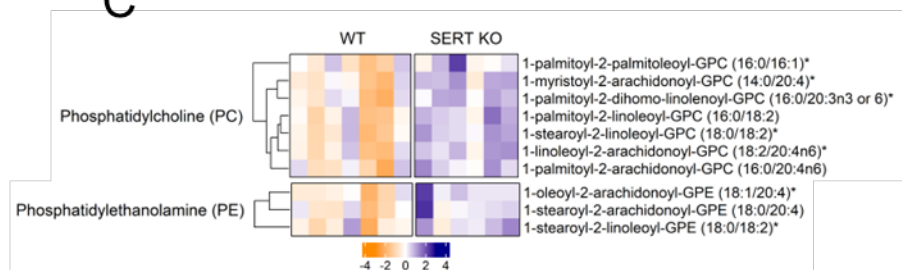

Supplemental Figure S1: **SERT KO mice have altered phosphatidylcholine (PC) and phosphatidylethanolamine (PE) metabolites.** **A.** Boxplot of overall phosphatidylcholine (PC) and **B.** phosphatidylethanolamine (PE) abundances in ileal mucosa (Welch *t*-test; WT *n* = 7; SERT KO *n* = 6). **C.** Heatmap of differentially altered PC and PE metabolites (*p* < 0.05, *q* < 0.1, Welch *t*-test; WT *n* = 7; SERT KO *n* = 6).

A

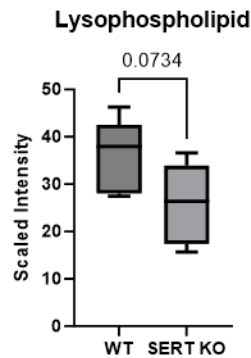

B

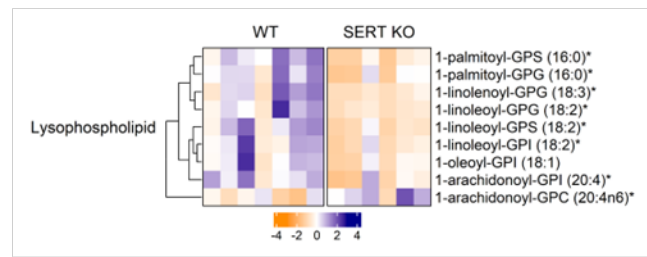

Supplemental Figure S2: **Lysophospholipid metabolites are diminished in SERT KO ileal mucosa.** **A.** Boxplot of overall lysophospholipid abundances in ileal mucosa (Welch *t*-test; WT *n* = 7; SERT KO *n* = 6) **B.** Heatmap of differentially altered lysophospholipid metabolites ( $p < 0.05$ ,  $q < 0.1$ , Welch *t*-test; WT *n* = 7; SERT KO *n* = 6).

A

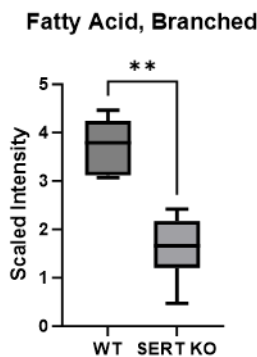

B

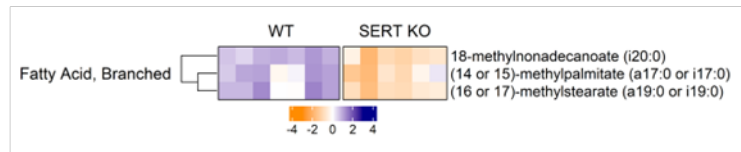

Supplemental Figure S3: **Ileal mucosa lacking SERT demonstrates diminished levels of branched fatty acids.** **A.** Boxplot of overall branched fatty acid abundances in ileal mucosa (Welch *t*-test; WT *n* = 7; SERT KO *n* = 6) **B.** Heatmap of differentially altered branched fatty acid metabolites ( $p < 0.05$ ,  $q < 0.1$ , Welch *t*-test; WT *n* = 7; SERT KO *n* = 6). \*\*  $p < 0.01$

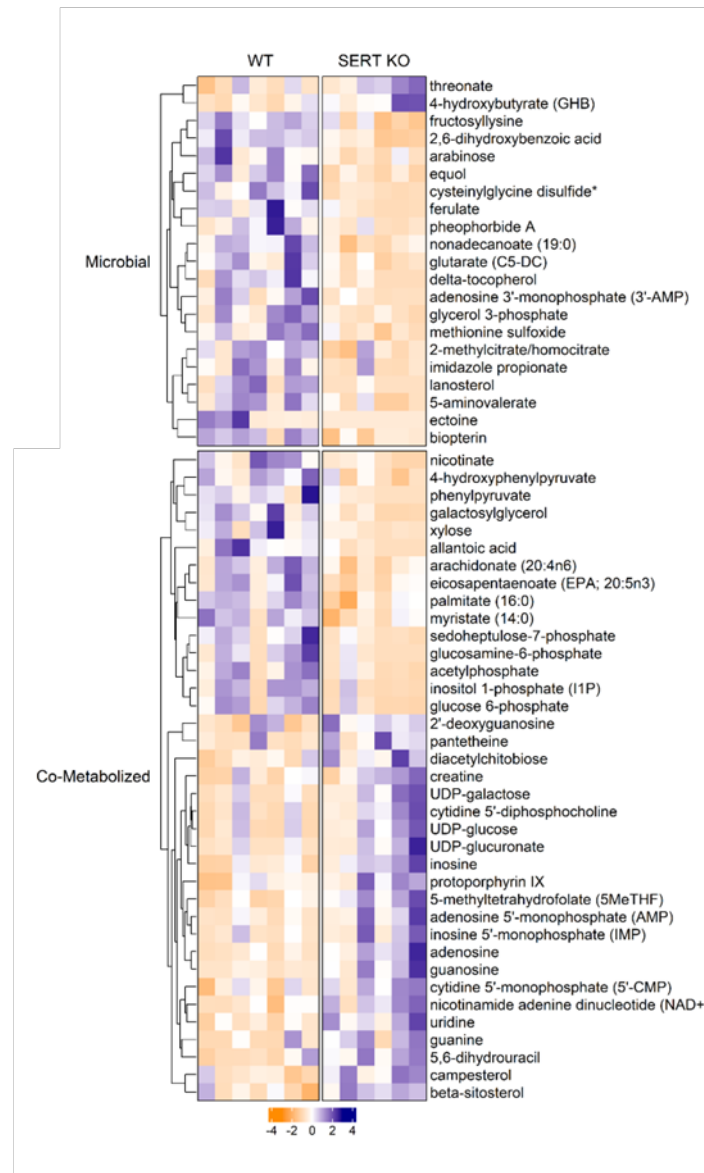

Supplemental Figure S4: **Heatmap of microbial-related and co-metabolized differentially altered metabolites between WT and SERT KO mice in the ileal mucosa.** Metabolites were classified based upon MetOrigin classification. ( $p < 0.05$ ,  $q < 0.1$ , Welch t-test; WT  $n = 7$ ; SERT KO  $n = 6$ ).

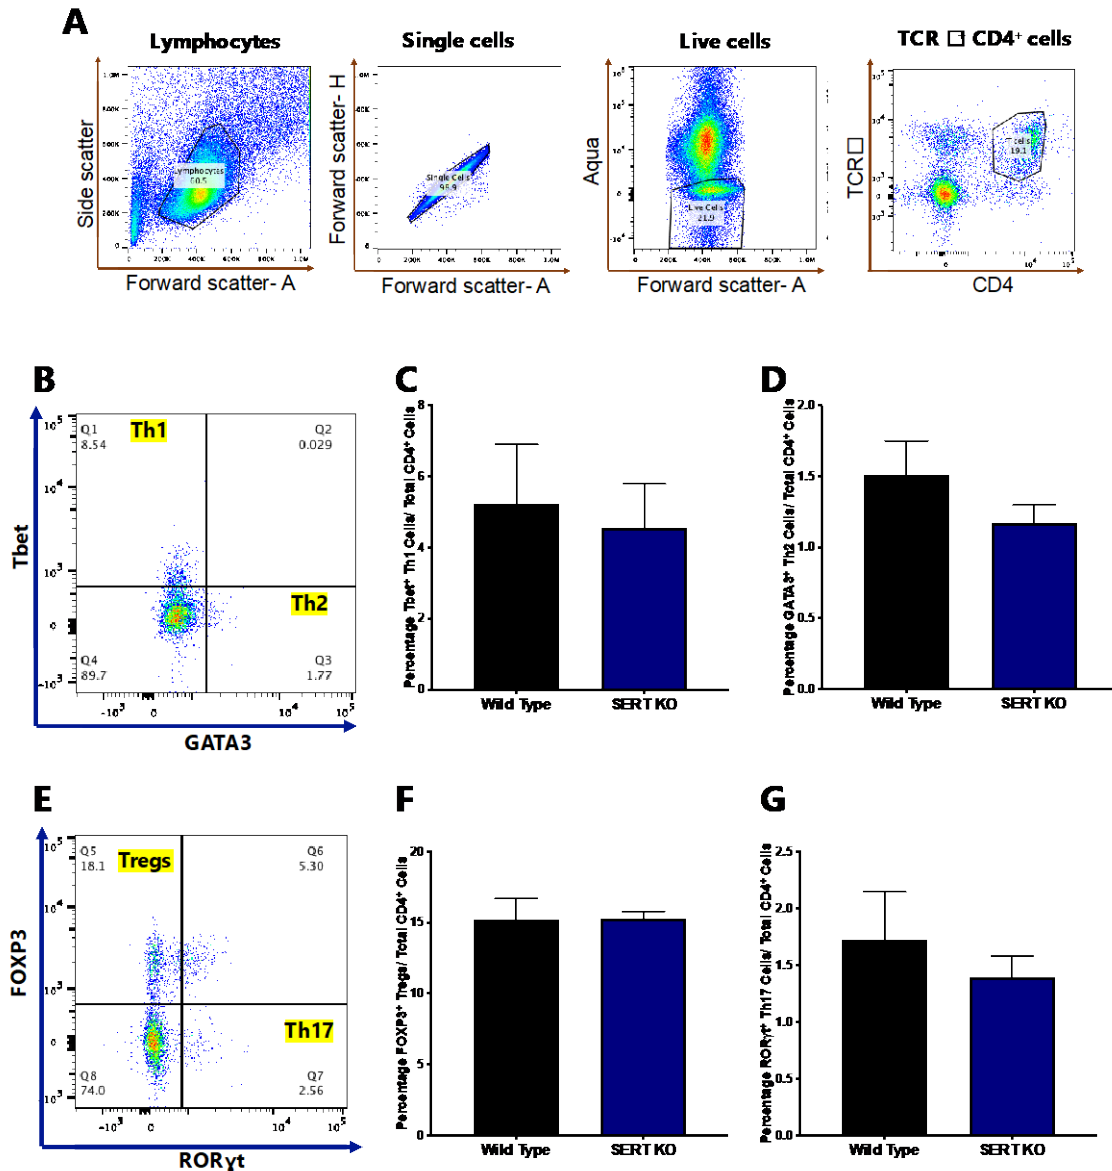

Supplemental Figure S5: **Various CD4<sup>+</sup> T cell populations in ileal lamina propria of wild type and SERT KO mice.** Lamina propria lymphocytes were isolated from mice ileal tissues and 1 million cells were stained for Th cell transcription factors marking Th1 (Tbet), Th2 (GATA3), Th17 (ROR $\gamma$ t) and T regulatory cells (FOXP3) **A.** Gating strategy in FACS analysis for CD4<sup>+</sup> T cells. **B.** FACS dot plots identifying Th1 (Q1) and Th2 (Q3) populations. **C.** Representative bar diagram showing percentage of Th1 cells in total CD4<sup>+</sup> Cell population. **D.** Representative bar diagram showing percentage of Th2 cells in total CD4<sup>+</sup> Cell population. **E.** FACS dot plots identifying Tregs (Q5) and Th17 (Q7) populations. **F.** Representative bar diagram showing percentage of Treg cells in total CD4<sup>+</sup> Cell population. **G.** Representative bar diagram showing percentage of Th17 cells in total CD4<sup>+</sup> cell population in the ileum. Data represented as average  $\pm$  SEM, n=3.
